# Supplementary material
Source: ML conference proceedings conference paper supplement (https://proceedings.neurips.cc/paper_files/paper/2014/hash/a2137a2ae8e39b5002a3f8909ecb88fe-Abstract.html)
Supplement: Supplementary file [file a2137a2ae8e39b5002a3f8909ecb88fe-Supplemental.zip]

---

# Supplementary Material to Generalized Dantzig Selector: Application to the $k$ -support norm

---

## 1 Proof of Theorem 1

**Statement of Theorem:** Suppose that both design matrix  $\mathbf{X}$  and noise  $\mathbf{w}$  consists of i.i.d. Gaussian entries with zero mean variance 1 and  $\mathbf{X}$  has normalized columns, i.e.  $\|\mathbf{X}^{(j)}\|_2 = 1$ ,  $j = 1, \dots, p$ . If we solve the problem (1) with

$$\lambda_p \geq c\mathbb{E} [\mathcal{R}^*(\mathbf{X}^T \mathbf{w})] , \quad (\text{A.1})$$

where  $c > 1$  is a constant, then, with probability at least  $(1 - \eta_1 \exp(-\eta_2 n))$ , we have

$$\|\hat{\boldsymbol{\theta}} - \boldsymbol{\theta}^*\|_2 \leq \frac{4\sqrt{\mathcal{R}(\boldsymbol{\theta}^*)\lambda_p}}{(\ell_n - \omega(\mathcal{T}_{\mathcal{R}}(\boldsymbol{\theta}^*) \cap \mathbb{S}^{p-1}))} , \quad (\text{A.2})$$

where  $\omega(\mathcal{T}_{\mathcal{R}}(\boldsymbol{\theta}^*) \cap \mathbb{S}^{p-1})$  is the Gaussian width of the intersection of the error cone  $\mathcal{T}_{\mathcal{R}}(\boldsymbol{\theta}^*)$  and the unit spherical shell  $\mathbb{S}^{p-1}$ , and  $\ell_n$  is the expected length of a length  $n$  i.i.d. standard Gaussian vector with  $\frac{n}{\sqrt{n+1}} < \ell_n < \sqrt{n}$ , and  $\eta_1, \eta_2 > 0$  are constants.

*Proof:* We use the following lemma for the proof.

**Lemma 1** Suppose we solve the minimization problem (1) with  $\lambda_p \geq \mathcal{R}^*(\mathbf{X}^T \mathbf{w})$ . Then the error vector  $\hat{\Delta}$  belongs to the set

$$\mathcal{T}_{\mathcal{R}}(\boldsymbol{\theta}^*) := \text{cone} \{ \Delta \in \mathbb{R}^p : \mathcal{R}(\boldsymbol{\theta}^* + \Delta) \leq \mathcal{R}(\boldsymbol{\theta}^*) \} , \quad (\text{A.3})$$

and the error  $\hat{\Delta} = \hat{\boldsymbol{\theta}} - \boldsymbol{\theta}^*$  satisfies the following bound

$$\mathcal{R}^*(\mathbf{X}^T \mathbf{X} \hat{\Delta}) \leq 2\lambda_p \quad (\text{A.4})$$

*Proof:* By our choice of  $\lambda_p$ , both  $\boldsymbol{\theta}^*$  and  $\hat{\boldsymbol{\theta}}$  lie in the feasible set of (1), and by optimality of  $\hat{\boldsymbol{\theta}}$ ,

$$\mathcal{R}(\boldsymbol{\theta}^* + \hat{\Delta}) = \mathcal{R}(\hat{\boldsymbol{\theta}}) \leq \mathcal{R}(\boldsymbol{\theta}^*) . \quad (\text{A.5})$$

Also, by triangle inequality

$$\mathcal{R}^*(\mathbf{X}^T \mathbf{X} \hat{\Delta}) = \mathcal{R}^*(\mathbf{X}^T \mathbf{X}(\hat{\boldsymbol{\theta}} - \boldsymbol{\theta}^*)) \quad (\text{A.6})$$

$$\leq \mathcal{R}^*(\mathbf{X}^T(\mathbf{y} - \mathbf{X}\boldsymbol{\theta}^*)) + \mathcal{R}^*(\mathbf{X}^T(\mathbf{y} - \mathbf{X}\hat{\boldsymbol{\theta}})) \leq 2\lambda_p . \quad (\text{A.7})$$

■

Now, note that since  $\mathcal{R}^*(\cdot)$  is Lipschitz continuous, choosing  $\lambda_p \geq c\mathbb{E} [\mathcal{R}^*(\mathbf{X}^T \mathbf{w})]$  ensures that  $\lambda_p \geq \mathcal{R}^*(\mathbf{X}^T \mathbf{w})$  with high probability, by Gaussian concentration on Lipschitz functions [2]. Then,

both  $\theta^*$  and  $\hat{\theta}$  lie in the feasible set of (1), since  $\mathcal{R}^*(\mathbf{X}^T(\mathbf{y} - \mathbf{X}\theta^*)) = \mathcal{R}^*(\mathbf{X}^T\mathbf{w}) \leq \lambda_p$  by the choice of  $\lambda_p$ . Also, from Lemma 1, we have

$$\mathcal{R}^*(\mathbf{X}^T\mathbf{X}\hat{\Delta}) \leq 2\lambda_p \quad (\text{A.8})$$

Now, note that

$$\|\mathbf{X}\hat{\Delta}\|_2^2 = \langle \hat{\Delta}, \mathbf{X}^T\mathbf{X}\hat{\Delta} \rangle \leq |\langle \hat{\Delta}, \mathbf{X}^T\mathbf{X}\hat{\Delta} \rangle| \leq \mathcal{R}(\hat{\Delta})\mathcal{R}^*(\mathbf{X}^T\mathbf{X}\hat{\Delta}) \leq 2\lambda_p\mathcal{R}(\hat{\Delta}), \quad (\text{A.9})$$

where we have used Holder's inequality, and the bound  $\mathcal{R}^*(\mathbf{X}^T\mathbf{X}\hat{\Delta}) \leq 2\lambda_p$  from above.

Next, we use the definition of the error set (A.3) and triangle inequality to obtain

$$\mathcal{R}(\hat{\Delta}) - \mathcal{R}(\theta^*) \leq \mathcal{R}(\theta^* + \hat{\Delta}) \leq \mathcal{R}(\theta^*), \quad (\text{A.10})$$

so that

$$\mathcal{R}(\hat{\Delta}) \leq 2\mathcal{R}(\theta^*), \quad (\text{A.11})$$

and we obtain the bound

$$\|\mathbf{X}\hat{\Delta}\|_2^2 \leq 4\lambda_p\mathcal{R}(\theta^*). \quad (\text{A.12})$$

Lastly, we use Gordon's theorem, which states that for  $\mathbf{X}$  with i.i.d. Gaussian  $(0, 1)$  entries,

$$\mathbf{E} \left[ \min_{\mathbf{z} \in \mathcal{T}_{\mathcal{R}}(\theta^*) \cap \mathbb{S}^{p-1}} \|\mathbf{X}\mathbf{z}\|_2 \right] \geq \ell_n - \omega(\mathcal{T}_{\mathcal{R}}(\theta^*) \cap \mathbb{S}^{p-1}), \quad (\text{A.13})$$

where  $\ell_n$  is the expected length of an i.i.d. Gaussian random vector of length  $n$ , and  $\omega(\mathcal{T}_{\mathcal{R}}(\theta^*) \cap \mathbb{S}^{p-1})$  is the Gaussian width of the set  $\Omega = (\mathcal{T}_{\mathcal{R}}(\theta^*) \cap \mathbb{S}^{p-1})$ . Now, since the function  $\mathbf{X} \rightarrow \min_{\mathbf{z} \in \Omega} \|\mathbf{X}\mathbf{z}\|_2$  is Lipschitz continuous with constant 1 over the set  $\Omega$ , we can use Gaussian concentration of Lipschitz functions [2] to obtain

$$\|\mathbf{X}\hat{\Delta}\|_2 \geq \frac{1}{2} (\ell_n - \omega(\mathcal{T}_{\mathcal{R}}(\theta^*) \cap \mathbb{S}^{p-1})) \|\hat{\Delta}\|_2 \quad (\text{A.14})$$

with probability greater than  $1 - \exp\left(-\frac{1}{8} (\ell_n - \omega(\mathcal{T}_{\mathcal{R}}(\theta^*) \cap \mathbb{S}^{p-1}))^2\right)$ , where  $c_1, c_2 > 0$  are constants. Combining (A.14) and (A.12), we obtain

$$\|\hat{\Delta}\|_2 \leq \frac{4\sqrt{\mathcal{R}(\theta^*)\lambda_p}}{(\ell_n - \omega(\mathcal{T}_{\mathcal{R}}(\theta^*) \cap \mathbb{S}^{p-1}))} \quad (\text{A.15})$$

with probability greater than  $1 - \exp\left(-\frac{1}{8} (\ell_n - \omega(\mathcal{T}_{\mathcal{R}}(\theta^*) \cap \mathbb{S}^{p-1}))^2\right)$ , and the statement of the theorem follows. ■

## 2 Proof of Theorem 2

Given a vector  $\mathbf{x}$ , we use the notation  $\mathbf{x}_{i:j}$  to denote its subvector  $(\mathbf{x}_i, \mathbf{x}_{i+1}, \dots, \mathbf{x}_j)$ .

**Statement of Theorem:** Given  $\lambda > 0$  and  $\mathbf{x} \in \mathbb{R}^p$ , if  $\|\mathbf{x}\|_k^{sp^*} \leq \lambda$ , then  $\mathbf{w}^* = \text{prox}_{\mathbb{I}_{C_\lambda}}(\mathbf{x}) = \mathbf{x}$ . If  $\|\mathbf{x}\|_k^{sp^*} > \lambda$ , define  $A_{sr} = \sum_{i=s+1}^r |\mathbf{x}|_i^\downarrow$ ,  $B_s = \sum_{i=1}^s (|\mathbf{x}|_i^\downarrow)^2$ , in which  $0 \leq s < k$  and  $k \leq r \leq p$ , and construct the nonlinear equation of  $\beta$ ,

$$(k-s)A_{sr}^2 \left[ \frac{1+\beta}{r-s+(k-s)\beta} \right]^2 - \lambda^2(1+\beta)^2 + B_s = 0. \quad (\text{A.16})$$

Let  $\beta_{sr}$  be given by

$$\beta_{sr} = \begin{cases} \text{nonnegative root of (A.16)} & \text{if } s > 0 \text{ and the root exists} \\ 0 & \text{otherwise} \end{cases}. \quad (\text{A.17})$$

Then the proximal operator  $\mathbf{w}^* = \text{prox}_{\mathbb{C}_\lambda}(\mathbf{x})$  is given by

$$|\mathbf{w}^*|_i^\downarrow = \begin{cases} \frac{1}{1+\beta_{s^*r^*}}|\mathbf{x}|_i^\downarrow & \text{if } 1 \leq i \leq s^* \\ \sqrt{\frac{\lambda^2 - B_{s^*}}{k-s^*}} & \text{if } s^* < i \leq r^* \text{ and } \beta_{s^*r^*} = 0 \\ \frac{A_{s^*r^*}}{r^* - s^* + (k-s^*)\beta_{s^*r^*}} & \text{if } s^* < i \leq r^* \text{ and } \beta_{s^*r^*} > 0 \\ |\mathbf{x}|_i^\downarrow & \text{if } r^* < i \leq p \end{cases}, \quad (\text{A.18})$$

where the indices  $s^*$  and  $r^*$  with computed  $|\mathbf{w}^*|^\downarrow$  make the following two inequalities hold,

$$|\mathbf{w}^*|_{s^*}^\downarrow > |\mathbf{w}^*|_k^\downarrow, \quad (\text{A.19})$$

$$|\mathbf{x}|_{r^*+1}^\downarrow \leq |\mathbf{w}^*|_k^\downarrow < |\mathbf{x}|_{r^*}^\downarrow. \quad (\text{A.20})$$

There might be multiple pairs of  $(s, r)$  satisfying the inequalities (A.19)-(A.20), and we choose the pair with the smallest  $\|\mathbf{x}^\downarrow - |\mathbf{w}^*|^\downarrow\|_2$ . Finally,  $\mathbf{w}^*$  is obtained by sign-changing and reordering  $|\mathbf{w}^*|^\downarrow$  to conform to  $\mathbf{x}$ .

*Proof:* Let  $\mathbf{w}^* = \text{prox}_{\mathbb{C}_\lambda}(\mathbf{x}) = \text{argmin}_{\mathbf{w} \in \mathbb{C}_\lambda} \frac{1}{2}\|\mathbf{x} - \mathbf{w}\|_2^2$ . For simplicity, we drop the constant  $\frac{1}{2}$  in later discussion. We consider the following two cases.

**Case 1:** if  $\|\mathbf{x}\|_k^{sp*} \leq \lambda$ , it is trivial that  $\mathbf{w}^* = \mathbf{x}$ , which is also the global minimizer of  $\|\mathbf{x} - \mathbf{w}\|_2^2$  without the constraint  $\mathbf{x} \in \mathbb{C}_\lambda$ .

**Case 2:** if  $\|\mathbf{x}\|_k^{sp*} > \lambda$ , first we start by noting that, given  $\mathbf{x}$  and  $\mathbf{w}$ ,  $\|\mathbf{x} - \mathbf{w}\|_2^2 = \|\mathbf{x}\|_2^2 - 2\langle \mathbf{x}, \mathbf{w} \rangle + \|\mathbf{w}\|_2^2 \geq \|\mathbf{x}\|_2^2 - 2\langle \mathbf{x}^\downarrow, |\mathbf{w}^\downarrow| \rangle + \|\mathbf{w}\|_2^2$ , which implies that  $\mathbf{w}^*$  should achieve this lower bound by conforming with the signs and orders of elements in  $\mathbf{x}$ . Without loss of generality, we are simply focused on the case where  $\mathbf{x} = |\mathbf{x}|^\downarrow$ .

For  $\mathbf{w}^*$  to be the optimal,  $\mathbf{w}_{k:p}^*$  should be chosen such that  $\mathbf{w}_{k:r}^* = (\mathbf{w}_k^*, \mathbf{w}_k^*, \dots, \mathbf{w}_k^*)$  and  $\mathbf{w}_{r+1:p}^* = \mathbf{x}_{r+1:p}$ , where  $r$  satisfies  $\mathbf{x}_r > \mathbf{w}_k^* \geq \mathbf{x}_{r+1}$ , otherwise either the decreasing order of  $\mathbf{w}^*$  will be violated or the  $\|\mathbf{x}_{k:p} - \mathbf{w}_{k:p}\|_2$  is not minimized. As for  $\mathbf{w}_{1:k-1}^*$ , we similarly assume  $\mathbf{w}_{s+1:k-1}^* = (\mathbf{w}_k^*, \mathbf{w}_k^*, \dots, \mathbf{w}_k^*)$  for some  $0 \leq s \leq k-1$ , then  $\mathbf{w}_{1:s}^*$  should be chosen to minimize  $\|\mathbf{x}_{1:s} - \mathbf{w}_{1:s}\|_2$  such that  $\|\mathbf{w}_{1:s}\|_2^2 = \|\mathbf{w}_{1:k}^*\|_2^2 - \|\mathbf{w}_{s+1:k}^*\|_2^2 \leq \lambda^2 - (k-s)(\mathbf{w}_k^*)^2$ . By Cauchy-Schwarz Inequality, we note that

$$\begin{aligned} \|\mathbf{x}_{1:s} - \mathbf{w}_{1:s}\|_2^2 &= \|\mathbf{x}_{1:s}\|_2^2 - 2\langle \mathbf{x}_{1:s}, \mathbf{w}_{1:s} \rangle + \|\mathbf{w}_{1:s}\|_2^2 \\ &\geq \|\mathbf{x}_{1:s}\|_2^2 - 2\|\mathbf{x}_{1:s}\|_2 \|\mathbf{w}_{1:s}\|_2 + \|\mathbf{w}_{1:s}\|_2^2 \end{aligned}$$

where the equality holds when  $\mathbf{w}_{1:s}^*$  follows the form of  $\mathbf{w}_{1:s}^* = \frac{1}{1+\beta_{sr}}\mathbf{x}_{1:s}$ , and  $\beta_{sr} \geq 0$  satisfies the constraint  $\frac{B_s}{(1+\beta_{sr})^2} = \lambda^2 - (k-s)(\mathbf{w}_k^*)^2$ .

So far we have figured out the structure of  $\mathbf{w}^* = (\mathbf{w}_{1:s}^*, \mathbf{w}_{s+1:r}^*, \mathbf{w}_{r+1:p}^*)$ , in which the three subvectors, compared with  $\mathbf{x}$ , are shrunk by a common factor  $1 + \beta_{sr}$ , constant  $\mathbf{w}_k^*$ , or unchanged. Next we need to determine the value of  $\beta_{sr}$  and  $\mathbf{w}_k^*$ . By optimality,  $\|\mathbf{x} - \mathbf{w}\|_2^2 = \|\mathbf{x}_{1:r} - \mathbf{w}_{1:r}\|_2^2$  must be minimized at  $\mathbf{w}^*$ , so we have the following problem,

$$\begin{aligned} \min_{\beta, \mathbf{w}_k} \|\mathbf{x}_{1:r} - \mathbf{w}_{1:r}\|_2^2 &= \|\mathbf{x}_{1:s} - \mathbf{w}_{1:s}\|_2^2 + \|\mathbf{x}_{s+1:r} - \mathbf{w}_{s+1:r}\|_2^2 \\ &= \left(\frac{\beta}{1+\beta}\right)^2 B_s + \sum_{i=s+1}^r (\mathbf{x}_i - \mathbf{w}_k)^2 \end{aligned} \quad (\text{A.21})$$

$$\text{s.t. } (\|\mathbf{w}\|_k^{sp*})^2 = \frac{B_s}{(1+\beta)^2} + (k-s)(\mathbf{w}_k)^2 = \lambda^2 \quad (\text{A.22})$$

Replacing  $\mathbf{w}_k$  in (A.21) with  $\mathbf{w}_k = \sqrt{\frac{\lambda^2 - \frac{B_s}{(1+\beta)^2}}{k-s}}$  obtained from (A.22), we express  $\|\mathbf{x}_{1:r} - \mathbf{w}_{1:r}\|_2^2$  as a function of  $\beta$ ,

$$\Phi_{sr}(\beta) = \left(\frac{\beta}{1+\beta}\right)^2 B_s + \sum_{i=s+1}^r \left(\mathbf{x}_i - \sqrt{\frac{\lambda^2 - \frac{B_s}{(1+\beta)^2}}{k-s}}\right)^2 \quad (\text{A.23})$$

Set derivative of  $\Phi_{sr}(\beta)$  to be zero, we have

$$\frac{d}{d\beta}\Phi_{sr}(\beta) = \frac{d}{d\beta}\left[\left(\frac{\beta}{1+\beta}\right)^2 B_s + \sum_{i=s+1}^r (\mathbf{x}_i - \sqrt{\frac{\lambda^2 - \frac{B_s}{(1+\beta)^2}}{k-s}})^2\right] \quad (\text{A.24})$$

$$= \frac{2\beta}{(1+\beta)^3} B_s - \frac{2A_{sr}B_s}{(1+\beta)^3(k-s)\sqrt{\frac{\lambda^2 - \frac{B_s}{(1+\beta)^2}}{k-s}}} + \frac{2(r-s)B_s}{(k-s)(1+\beta)^3} \quad (\text{A.25})$$

$$= \frac{2B_s}{(k-s)(1+\beta)^3} \left[ (k-s)\beta - \frac{A_{sr}}{\sqrt{\frac{\lambda^2 - \frac{B_s}{(1+\beta)^2}}{k-s}}} + (r-s) \right] = 0 \quad (\text{A.26})$$

If  $s > 0$ , then  $B_s > 0$  and (A.26) is equivalent to (A.16). And we can see that the quantity inside the bracket of (A.26) is monotonically increasing when  $\beta \geq \max(0, \frac{\sqrt{B_s}-\lambda}{\lambda})$ , thus ensuring the nonnegative root  $\beta_{sr}$  is unique if existing. If the nonnegative root exists, the expression for  $\mathbf{w}_{s+1:r}^*$  can be obtained from (A.26), whose entries are all equal to  $\mathbf{w}_k^*$ .

If  $s > 0$  and a nonnegative root of (A.26) is nonexistent, the derivative is always positive when  $\beta \geq 0$ , which means that  $\Phi_{sr}(\beta)$  is increasing. Hence the minimizer of  $\Phi_{sr}(\beta)$  is  $\beta_{sr} = 0$ . If  $s = 0$ , we actually do not care about the value of  $\beta_{sr}$  because the problem defined by (A.21) and (A.22) is independent of  $\beta$ , and we set it to be 0 for simplicity. According to (A.22), both cases of  $\beta_{sr} = 0$  lead to the same expression for  $\mathbf{w}_{s+1:r}^*$  in (A.18).

As we do not know beforehand which  $s$  and  $r$  to choose, we need to search for  $r^*$  and  $s^*$  that gives the smallest  $\|\mathbf{x}^\downarrow - \mathbf{w}^\downarrow\|_2$ , and also to check whether the  $\mathbf{w}^*$  obtained by (A.18) is in decreasing order, which are the conditions (A.19) and (A.20) presented in Theorem 2. ■

### 3 Proof of Theorem 3

**Statement of Theorem:** In search of  $(s^*, r^*)$  defined in Theorem 2, there can be only one  $\tilde{r}$  for a given candidate  $\tilde{s}$  of  $s^*$ , such that the inequality (A.20) is satisfied. Moreover if such  $\tilde{r}$  exists, then for any  $r < \tilde{r}$ , the associated  $|\tilde{\mathbf{w}}|_k^\downarrow$  violates the first part of (A.20), and for  $r > \tilde{r}$ ,  $|\tilde{\mathbf{w}}|_k^\downarrow$  violates the second part of (A.20). On the other hand, based on the  $\tilde{r}$ , we have following assertion of  $s^*$ ,

$$s^* \begin{cases} > \tilde{s} & \text{if } \tilde{r} \text{ does not exist} \\ \geq \tilde{s} & \text{if } \tilde{r} \text{ exists and corresponding } |\tilde{\mathbf{w}}|_k^\downarrow \text{ satisfies (A.19)} \\ < \tilde{s} & \text{if } \tilde{r} \text{ exists but corresponding } |\tilde{\mathbf{w}}|_k^\downarrow \text{ violates (A.19)} \end{cases} \quad (\text{A.27})$$

To prove Theorem 3, we first need the following corollary from Theorem 2.

**Corollary 1** When  $\beta \geq \max(0, \frac{\sqrt{B_s}-\lambda}{\lambda})$ ,  $\Phi_{sr}(\beta)$  defined in (A.23) is decreasing when  $\beta < \beta_{sr}$ , and increasing when  $\beta > \beta_{sr}$ . Equivalently,  $\Phi_{sr}(\beta) = \|\mathbf{x}_{1:r} - \mathbf{w}_{1:r}\|_2^2$ , when treated as function of  $\mathbf{w}_k$ , is decreasing when  $\mathbf{w}_k < \mathbf{w}_k^*$  and increasing when  $\mathbf{w}_k > \mathbf{w}_k^*$ .

*Proof:* The first part simply follows the monotonicity of  $\frac{d}{d\beta}\Phi_{sr}(\beta)$  mentioned in the proof of Theorem 2, which implies that  $\frac{d}{d\beta}\Phi_{sr}(\beta)$  is negative when  $\beta < \beta_{sr}$ , and positive when  $\beta > \beta_{sr}$ . The constraint (A.22) implies that  $\mathbf{w}_k$  increases as  $\beta$  increases. So  $\|\mathbf{x}_{1:r} - \mathbf{w}_{1:r}\|_2^2$ , as a function of  $\mathbf{w}_k$ , has the same monotonicity w.r.t.  $\mathbf{w}_k$ . ■

Now we present the proof of Theorem 3.

*Proof:* First we show by contradiction that for a given  $s$ , the  $\tilde{r}$  that satisfies (A.20) can be at most one. Suppose there are two indices, say  $r_1$  and  $r_2$ , which satisfy that condition with a certain  $s$ .

Without loss of generality, let  $r_1 < r_2$ , we know that their corresponding  $\mathbf{w}^{(1)}$  and  $\mathbf{w}^{(2)}$  should minimize  $\|\mathbf{x}_{1:r_1} - \mathbf{w}_{1:r_1}\|_2^2$  and  $\|\mathbf{x}_{1:r_2} - \mathbf{w}_{1:r_2}\|_2^2$ , respectively. As  $r_1 < r_2$ , then  $\mathbf{w}_k^{(1)} \geq \mathbf{x}_{r_2} > \mathbf{w}_k^{(2)}$  according to (A.20). Construct

$$\mathbf{w}' = \left( \underbrace{\frac{\mathbf{x}_1}{1+\beta'}, \dots, \frac{\mathbf{x}_s}{1+\beta'}}_s, \underbrace{\mathbf{x}_{r_2}, \dots, \mathbf{x}_{r_2}}_{r_2-s}, \mathbf{x}_{r_2+1}, \dots, \mathbf{x}_p \right)$$

where  $\beta'$  is chosen to satisfy the constraint (A.22) with  $\mathbf{w}'_k = \mathbf{x}_{r_2}$ , and  $\|\mathbf{x}_{1:r_2} - \mathbf{w}'_{1:r_2}\|_2^2$  can be decomposed as

$$\begin{aligned} \|\mathbf{x}_{1:r_2} - \mathbf{w}'_{1:r_2}\|_2^2 &= \|\mathbf{x}_{1:r_1} - \mathbf{w}'_{1:r_1}\|_2^2 + \|\mathbf{x}_{r_1+1:r_2} - \mathbf{w}'_{r_1+1:r_2}\|_2^2 \\ &> \|\mathbf{x}_{1:r_1} - \mathbf{w}'_{1:r_1}\|_2^2 + \|\mathbf{x}_{r_1+1:r_2} - \mathbf{w}'_{r_1+1:r_2}\|_2^2 \\ &= \|\mathbf{x}_{1:r_2} - \mathbf{w}'_{1:r_2}\|_2^2 \end{aligned}$$

which contradicts that  $\mathbf{w}_{1:r_2}^{(2)}$  minimize  $\|\mathbf{x}_{1:r_2} - \mathbf{w}_{1:r_2}\|_2^2$ . Note that  $\|\mathbf{x}_{1:r_1} - \mathbf{w}_{1:r_1}^{(2)}\|_2^2 > \|\mathbf{x}_{1:r_1} - \mathbf{w}'_{1:r_1}\|_2^2$  simply follows Corollary 1 as  $\mathbf{w}_k^{(1)} \geq \mathbf{x}_{r_2} = \mathbf{w}'_k > \mathbf{w}_k^{(2)}$ , and  $\|\mathbf{x}_{r_1+1:r_2} - \mathbf{w}_{r_1+1:r_2}^{(2)}\|_2^2 > \|\mathbf{x}_{r_1+1:r_2} - \mathbf{w}'_{r_1+1:r_2}\|_2^2$  is due to the fact that  $\mathbf{x}_{r_1+1} \geq \dots \geq \mathbf{x}_{r_2} = \mathbf{w}'_k > \mathbf{w}_k^{(2)}$ .

Next we show by contradiction that if  $\tilde{r}$  exists for given  $s$ , then any  $r < \tilde{r}$  violates the first part of (A.20), and any  $r > \tilde{r}$  violates second part. Let  $\tilde{\mathbf{w}}$  denote the minimizer of  $\|\mathbf{x}_{1:\tilde{r}} - \mathbf{w}_{1:\tilde{r}}\|_2^2$ . Suppose  $r < \tilde{r}$  and the first part of (A.20) is not violated, then its second part must be violated due to the uniqueness of  $\tilde{r}$ . Then we can construct new

$$\mathbf{w}' = \left( \underbrace{\frac{\mathbf{x}_1}{1+\beta'}, \dots, \frac{\mathbf{x}_s}{1+\beta'}}_s, \underbrace{\mathbf{x}_{\tilde{r}}, \dots, \mathbf{x}_{\tilde{r}}}_{\tilde{r}-s}, \mathbf{x}_{\tilde{r}+1}, \dots, \mathbf{x}_p \right),$$

where  $\beta'$  is again chosen to satisfy the constraint (A.22) with  $\mathbf{w}'_k = \mathbf{x}_{\tilde{r}}$ . This by the same argument for proving the uniqueness of  $\tilde{r}$  make the following inequality hold,

$$\begin{aligned} \|\mathbf{x}_{1:\tilde{r}} - \tilde{\mathbf{w}}_{1:\tilde{r}}\|_2^2 &= \|\mathbf{x}_{1:r} - \tilde{\mathbf{w}}_{1:r}\|_2^2 + \|\mathbf{x}_{r+1:\tilde{r}} - \tilde{\mathbf{w}}_{r+1:\tilde{r}}\|_2^2 \\ &> \|\mathbf{x}_{1:r} - \mathbf{w}'_{1:r}\|_2^2 + \|\mathbf{x}_{r+1:\tilde{r}} - \mathbf{w}'_{r+1:\tilde{r}}\|_2^2 \\ &= \|\mathbf{x}_{1:\tilde{r}} - \mathbf{w}'_{1:\tilde{r}}\|_2^2. \end{aligned}$$

This contradicts that  $\tilde{\mathbf{w}}$  is the minimizer of  $\|\mathbf{x}_{1:\tilde{r}} - \mathbf{w}_{1:\tilde{r}}\|_2^2$ . Similar argument applies to the case when  $r > \tilde{r}$ . We construct another

$$\mathbf{w}'' = \left( \underbrace{\frac{\mathbf{x}_1}{1+\beta''}, \dots, \frac{\mathbf{x}_s}{1+\beta''}}_s, \underbrace{\mathbf{x}_{r+1}, \dots, \mathbf{x}_{r+1}}_{r-s}, \mathbf{x}_{r+1}, \dots, \mathbf{x}_p \right),$$

which gives smaller  $\|\mathbf{x}_{1:r} - \mathbf{w}_{1:r}\|_2^2$  than any  $\mathbf{w}$  with  $\mathbf{w}_k < \mathbf{x}_{r+1}$  according to Corollary 1. Therefore it is impossible for  $r > \tilde{r}$  to violate the first inequality. Note that  $\beta''$  together with  $\mathbf{w}''_k = \mathbf{x}_{r+1}$  satisfies (A.22).

Finally we show the assertion (A.27) for  $s^*$ . We note that when  $\tilde{s}$  is fixed, finding solution to the proximal operator can be regarded as finding the minimizer of (A.21) under the constraint  $\mathbf{w}_k = \mathbf{w}_{k-1} = \dots = \mathbf{w}_{\tilde{s}+1}$ . So for  $s < \tilde{s}$ , the minimization problem is equivalent to the one for  $\tilde{s}$  under additional constraint  $\mathbf{w}_{\tilde{s}+1} = \mathbf{w}_{\tilde{s}} = \dots = \mathbf{w}_{s+1}$ . Therefore if  $\tilde{r}$  does not exist or  $|\tilde{\mathbf{w}}|_k^\downarrow$  already satisfies (A.19), then  $s^* \geq \tilde{s}$  because  $s < \tilde{s}$  considers a more restricted problem and is unable to get a better result.

For the situation in which  $\tilde{r}$  exists for  $\tilde{s}$  but associated  $|\tilde{\mathbf{w}}|_k^\downarrow$  violates (A.19), we show by contradiction that for any  $s' > \tilde{s}$ , (A.19) is also violated. Assume that there is a solution  $\mathbf{w}'$  satisfying both (A.19) and (A.20) for  $s' = \tilde{s} + 1$  and the corresponding  $\tilde{r}'$ . It is not difficult to see that  $|\mathbf{w}'|_k^\downarrow < |\tilde{\mathbf{w}}|_k^\downarrow$  and  $\tilde{r}' \geq \tilde{r}$ . By the violation we have shown, we know that the minimizer of (A.21) for  $(s', \tilde{r})$ , denoted by  $\mathbf{w}''$ , satisfies  $|\mathbf{w}''|_k^\downarrow \leq |\mathbf{w}'|_k^\downarrow$  (Note that  $\mathbf{w}'$  is the minimizer of (A.21) for  $(s', \tilde{r}')$ ). Combined with  $|\mathbf{w}'|_k^\downarrow < |\tilde{\mathbf{w}}|_k^\downarrow$ , this indicates by Corollary 1 that  $\Phi_{s'\tilde{r}}(\cdot)$  increases on the interval  $[|\mathbf{w}''|_k^\downarrow, |\tilde{\mathbf{w}}|_k^\downarrow]$ . Then we consider two sequential modifications on  $\tilde{\mathbf{w}}$ ,

1. Replacing the  $|\tilde{\mathbf{w}}|_{1:s'}^\downarrow$  in  $|\tilde{\mathbf{w}}|^\downarrow$  with  $\frac{\| |\tilde{\mathbf{w}}|_{1:s'}^\downarrow \|_2}{\| |\mathbf{x}|_{1:s'}^\downarrow \|_2} |\mathbf{x}|_{1:s'}^\downarrow$ ,
2. Shrink  $|\tilde{\mathbf{w}}|_{s'+1:\tilde{r}}^\downarrow$  and amplify the new  $|\tilde{\mathbf{w}}|_{1:s'}^\downarrow$  by some factor such that (A.22) still holds for  $s'$  and  $|\tilde{\mathbf{w}}|_{s'+1}^\downarrow = |\tilde{\mathbf{w}}|_{s'}^\downarrow$ .

Note that the two modifications both decrease  $\|\mathbf{x}_{1:\tilde{r}} - \tilde{\mathbf{w}}_{1:\tilde{r}}\|_2$ . Decrease in Modification 1 is the result of Cauchy Schwarz Inequality, and decrease in Modification 2 is due to the monotonicity of  $\Phi_{s'\tilde{r}}(\cdot)$  we mentioned afont. The modified  $\tilde{\mathbf{w}}$  satisfies  $|\tilde{\mathbf{w}}|_{\tilde{s}+1}^\downarrow = |\tilde{\mathbf{w}}|_{\tilde{s}+2}^\downarrow = \dots = |\tilde{\mathbf{w}}|_k^\downarrow$ , thus contradicting that the old  $\tilde{\mathbf{w}}$  is the minimizer of (A.21) for  $(\tilde{s}, \tilde{r})$ . Hence, by induction, we conclude that for any  $s' > \tilde{s}$ , its solution also violates (A.19).

Assembling the conclusions above, we have (A.27) for  $s^*$ . ■

## 4 Proof of Theorem 4

**Statement of Theorem:** *For the  $k$ -support norm Generalized Dantzig Selection problem (20), we obtain*

$$\mathbf{E} [\mathcal{R}^*(\mathbf{X}^T \mathbf{w})] \leq k \left( \sqrt{2 \log \left( \frac{ep}{k} \right)} + 1 \right)^2 \quad (\text{A.28})$$

$$\omega(\mathcal{T}_{\mathcal{A}}(\boldsymbol{\theta}^*) \cap \mathbb{S}^{p-1})^2 \leq \left( \sqrt{2k \log \left( (p - k - \left\lceil \frac{s}{k} \right\rceil + 2) \right)} + \sqrt{k} \right)^2 \cdot \left\lceil \frac{s}{k} \right\rceil + s. \quad (\text{A.29})$$

*Proof:* We first illustrate that the  $k$ -support norm is an atomic norm, and then prove Theorem 4.

### 4.1 $k$ -Support norm as an Atomic Norm

Here we show that  $k$ -support norm satisfies the definition of atomic norms [1]. Consider  $\mathcal{G}_j$  to be the set of all subsets of  $\{1, 2, \dots, p\}$  of size  $j$ , so that

$$\mathcal{G}^{(k)} = \{\mathcal{G}_j\}_{j=1}^k. \quad (\text{A.30})$$

For every  $j$ , consider the set

$$\mathcal{A}_j = \{\mathbf{w} : \|(\mathbf{w}_{G_j})\|_2 = 1, G_j \in \mathcal{G}_j, \mathbf{w}_i = \frac{1}{\sqrt{j}}, \forall i \in G_j, \mathbf{w}_i = 0, \forall i \notin G_j\}, \quad (\text{A.31})$$

corresponding to  $\mathcal{G}_j$ , and the union of such sets

$$\mathcal{A} = \{\mathcal{A}_j\}_{j \in \{1, \dots, k\}}. \quad (\text{A.32})$$

Note that since every non-zero element in a vector in  $\mathcal{A}_j$  is  $\frac{1}{\sqrt{j}}$ , such an element cannot be represented as a convex combination of elements of the set  $\mathcal{A}_l$ ,  $l < j$ , whose non-zero elements are  $\frac{1}{\sqrt{l}}$ . Therefore none of the elements  $\mathbf{w}$  in the set  $\mathcal{A}$  lies in the convex hull of the other elements  $\mathcal{A} \setminus \{\mathbf{w}\}$ . Further, note that

$$\text{conv}(\mathcal{A}) = C_k, \quad (\text{A.33})$$

and the  $k$ -support norm defines the gauge function of the  $\mathcal{A}$ . Thus the  $k$ -support norm is an atomic norm.

### 4.2 The Error set and its Gaussian width

Note that the cardinality of the set  $\mathcal{G}^{(k)}$  is

$$M = \binom{p}{k} + \binom{p}{k-1} + \binom{p}{k-2} + \dots + \binom{p}{1} \quad (\text{A.34})$$

The error set is given by

$$\mathcal{T}_{\mathcal{A}}(\boldsymbol{\theta}^*) = \text{cone}\{\Delta \in \mathbb{R}^p : \|\Delta + \boldsymbol{\theta}^*\|_k^{sp} \leq \|\boldsymbol{\theta}^*\|_k^{sp}\}. \quad (\text{A.35})$$

Note that this set is a cone, and we can define the *normal* cone of this set as

$$\mathcal{N}_{\mathcal{A}}(\boldsymbol{\theta}^*) = \{\mathbf{u} : \langle \mathbf{u}, \Delta \rangle \leq 0, \forall \Delta \in \mathcal{T}_{\mathcal{A}}(\boldsymbol{\theta}^*)\} \quad (\text{A.36})$$

$$(\text{A.37})$$

The following proposition, shown in [3], shows that the normal cone can be written in terms of the dual norm of the  $k$ -support norm.

**Proposition 1** *The normal cone to the tangent cone defined in (A.35) can be written as*

$$\mathcal{N}_{\mathcal{A}}(\boldsymbol{\theta}^*) = \{\mathbf{u} : \exists t > 0 \text{ s.t. } \langle \mathbf{u}, \boldsymbol{\theta}^* \rangle = t\|\boldsymbol{\theta}^*\|_k^{sp}, \|\mathbf{u}\|_k^{sp*} \leq t\}. \quad (\text{A.38})$$

*Proof:* We re-write the definition of the normal cone in terms of the estimated parameter  $\hat{\boldsymbol{\theta}}$  as

$$\mathcal{N}_{\mathcal{A}}(\boldsymbol{\theta}^*) = \{\mathbf{u} \in \mathbb{R}^p : \langle \mathbf{u}, \boldsymbol{\theta} - \boldsymbol{\theta}^* \rangle \leq 0, \forall \boldsymbol{\theta} - \boldsymbol{\theta}^* \in \mathcal{T}_{\mathcal{A}}(\boldsymbol{\theta}^*)\}. \quad (\text{A.39})$$

Note that this means that  $\mathbf{u} \in \mathcal{N}_{\mathcal{A}}(\boldsymbol{\theta}^*)$  if and only if

$$\langle \mathbf{u}, \boldsymbol{\theta} - \boldsymbol{\theta}^* \rangle \leq 0, \quad \forall \|\boldsymbol{\theta}\|_k^{sp} \leq \|\boldsymbol{\theta}^*\|_k^{sp} \quad (\text{A.40})$$

$$\Rightarrow \langle \mathbf{u}, \boldsymbol{\theta} \rangle \leq \langle \mathbf{u}, \boldsymbol{\theta}^* \rangle \quad \forall \|\boldsymbol{\theta}\|_k^{sp} \leq \|\boldsymbol{\theta}^*\|_k^{sp}. \quad (\text{A.41})$$

Now, we claim that  $\langle \mathbf{u}, \boldsymbol{\theta}^* \rangle \geq 0$  for all such  $\mathbf{u}$ . This can be shown as follows. Assume the contrary, i.e. there exists a  $\hat{\mathbf{u}} \in \mathcal{N}_{\mathcal{A}}(\boldsymbol{\theta}^*)$  such that  $\langle \hat{\mathbf{u}}, \boldsymbol{\theta}^* \rangle < 0$ . Now, noting that  $(-\boldsymbol{\theta}^*) \in \mathcal{T}_{\mathcal{A}}(\boldsymbol{\theta}^*)$ , we have

$$\langle \hat{\mathbf{u}}, -\boldsymbol{\theta}^* \rangle = -\langle \hat{\mathbf{u}}, \boldsymbol{\theta}^* \rangle > 0, \quad (\text{A.42})$$

so that  $\hat{\mathbf{u}} \notin \mathcal{N}_{\mathcal{A}}(\boldsymbol{\theta}^*)$ , which is a contradiction, and the claim follows.

Therefore, we can write

$$\langle \mathbf{u}, \boldsymbol{\theta}^* \rangle = t\|\boldsymbol{\theta}^*\|_k^{sp} \quad (\text{A.43})$$

for some  $t \geq 0$ . Then,  $\mathbf{u} \in \mathcal{N}_{\mathcal{A}}(\boldsymbol{\theta}^*)$  if and only if

$$\exists t \geq 0, \langle \mathbf{u}, \boldsymbol{\theta}^* \rangle = t\|\boldsymbol{\theta}^*\|_k^{sp}, \quad \langle \mathbf{u}, \boldsymbol{\theta} \rangle \leq t\|\boldsymbol{\theta}^*\|_k^{sp} \quad \forall \|\boldsymbol{\theta}\|_k^{sp} \leq \|\boldsymbol{\theta}^*\|_k^{sp}. \quad (\text{A.44})$$

Since

$$\langle \mathbf{u}, \boldsymbol{\theta} \rangle \leq t\|\boldsymbol{\theta}^*\|_k^{sp}, \quad \forall \|\boldsymbol{\theta}\|_k^{sp} \leq \|\boldsymbol{\theta}^*\|_k^{sp} \Rightarrow \|\mathbf{u}\|_k^{sp*} \leq t, \quad (\text{A.45})$$

the statement follows. ■

The  $k$ -support norm can be thought of as a group sparse norm with overlaps, such as been dealt with in [3]. Therefore, we can utilize some of the analysis techniques developed in [3], specialized to the structure of the  $k$ -support norm. We begin by stating a theorem which enables us to bound the Gaussian width of the error set.

First, we define sets that involve the support set of  $\boldsymbol{\theta}^*$ . Let us define the set  $\mathcal{G}^* \subseteq \mathcal{G}^{(k)}$  to be the set of all groups in  $\mathcal{G}^{(k)}$  which overlap with the support of  $\boldsymbol{\theta}^*$ , i.e.

$$\mathcal{G}^* = \{G \in \mathcal{G}^{(k)} : G \cap \text{supp}(\boldsymbol{\theta}^*) \neq \emptyset\}. \quad (\text{A.46})$$

Let  $S$  be the union of all groups in  $\mathcal{G}^*$ , i.e.  $S = \bigcup_{G \in \mathcal{G}^*} G$ , and the size of  $S$  be  $|S| = s$ . We are going to use three lemmas in order to prove the above bound. The first lemma, proved in [1], upper bounds the Gaussian width by an expected distance to the normal cone as follows.

**Lemma 2 ([1] Proposition 3.6)** *Let  $\mathbb{C}$  be any nonempty convex in  $\mathbb{R}^p$ , and  $\mathbf{g} \sim \mathcal{N}(0, I_p)$  be a random gaussian vector. Then*

$$\omega(\mathbb{C} \cap \mathbb{S}^{p-1}) \leq \mathbf{E}_{\mathbf{g}}[\text{dist}(\mathbf{g}, \mathbb{C}^*)], \quad (\text{A.47})$$

where  $\mathbb{C}^*$  is the polar cone of  $\mathbb{C}$ .

Note that  $\mathcal{N}_{\mathcal{A}}$  is the polar cone of  $\mathcal{T}_{\mathcal{A}}$  by definition. Therefore, using Jensen's inequality, we obtain

$$\omega(\mathcal{T}_{\mathcal{A}} \cap \mathbb{S}^{p-1})^2 \leq \mathbf{E}_{\mathbf{g}}^2[\text{dist}(\mathbf{g}, \mathcal{N}_{\mathcal{A}})] \leq \mathbf{E}_{\mathbf{g}}[\text{dist}(\mathbf{g}, \mathcal{N}_{\mathcal{A}})^2] \leq \mathbf{E}_{\mathbf{g}}[\|\mathbf{g} - \mathbf{z}(\mathbf{g})\|_2^2], \quad (\text{A.48})$$

where  $\mathbf{z}(\mathbf{g}) \in \mathcal{N}_{\mathcal{A}}$  is a (random) vector constructed to lie always in the normal cone. The construction proceeds as follows.

**Constructing  $\mathbf{z}(\mathbf{g})$ :**

Note that  $\boldsymbol{\theta}_{S^c}^* = 0$ . Let us choose a vector  $\mathbf{v} \in \mathcal{N}_{\mathcal{A}}$  such that

$$\|\mathbf{v}\|_k^{sp*} = 1 \text{ and } \mathbf{v}_{S^c} = 0. \quad (\text{A.49})$$

We can choose an appropriately scaled  $\mathbf{v}$  so that

$$\langle \mathbf{v}, \boldsymbol{\theta}^* \rangle = \|\boldsymbol{\theta}^*\|_k^{sp}, \quad (\text{A.50})$$

and let us write without loss of generality  $\mathbf{v} = [\mathbf{v}_S \ \mathbf{v}_{S^c}]$ .

Next, let  $\mathbf{g} \sim \mathcal{N}(0, I_p)$ , and write  $\mathbf{g} = [\mathbf{g}_S \ \mathbf{g}_{S^c}]$ . We define the quantity

$$t(\mathbf{g}) = \max \left\{ \|\mathbf{g}_G\|_2 : G \in \mathcal{G}^{(k)}, G \subseteq S^c \right\} = \max \left\{ \left( \sum_{i \in G} \mathbf{g}_i^2 \right)^{\frac{1}{2}} : G \in \mathcal{G}^{(k)}, G \subseteq S^c \right\}, \quad (\text{A.51})$$

and let  $\mathbf{z} = \mathbf{z}(\mathbf{g}) = [\mathbf{z}_S \ \mathbf{z}_{S^c}]$  such that

$$\mathbf{z}_S = t(\mathbf{g})\mathbf{v}_S, \quad \mathbf{z}_{S^c} = \mathbf{g}_{S^c}. \quad (\text{A.52})$$

Note that

$$\langle \mathbf{z}, \boldsymbol{\theta}^* \rangle = t(\mathbf{g})\langle \mathbf{v}_S, \boldsymbol{\theta}_S^* \rangle = t(\mathbf{g})\|\boldsymbol{\theta}^*\|_k^{sp}, \quad (\text{A.53})$$

and

$$\|\mathbf{z}\|_k^{sp*} = \max \left\{ \|\mathbf{z}_G\|_2 : G \in \mathcal{G}^{(k)} \right\} \quad (\text{A.54})$$

$$= \max \left\{ \max \{ \|\mathbf{z}_G\|_2 : G \in \mathcal{G}^{(k)}, G \subseteq S \}, \max \{ \|\mathbf{z}_G\|_2 : G \in \mathcal{G}^{(k)}, G \subseteq S^c \} \right\} \quad (\text{A.55})$$

$$\stackrel{(a)}{=} \max \left\{ t(\mathbf{g})\|\mathbf{v}\|_k^{sp*}, t(\mathbf{g}) \right\} \quad (\text{A.56})$$

$$= t(\mathbf{g}) \quad (\text{A.57})$$

where (a) follows from the definition of  $t(\mathbf{g})$  and the fact that

$$\max \{ \|\mathbf{z}_G\|_2 : G \in \mathcal{G}^{(k)}, G \subseteq S \} = t(\mathbf{g}) \max \{ \|\mathbf{v}_G\|_2 : G \in \mathcal{G}^{(k)}, G \subseteq S \} = t(\mathbf{g})\|\mathbf{v}\|_k^{sp*}, \quad (\text{A.58})$$

and since  $\|\mathbf{v}\|_k^{sp*} = 1$ . Therefore,  $\mathbf{z}(\mathbf{g}) \in \mathcal{N}_{\mathcal{A}}(\boldsymbol{\theta}^*)$  by definition in (A.38).

In order to upper bound the expectation of  $t(\mathbf{g})$ , we use the following comparison inequality from [3].

**Lemma 3 ([3] Lemma 3.2)** *Let  $q_1, q_2, \dots, q_L$  be  $L$ ,  $\chi$ -squared random variables with  $d$  degrees of freedom. Then*

$$\mathbf{E} \left[ \max_{1 \leq i \leq L} q_i \right] \leq \left( \sqrt{2 \log L} + \sqrt{d} \right)^2. \quad (\text{A.59})$$

Last, we prove an upper bound on the expected value of  $t(\mathbf{g})$ , as shown in the following lemma.

**Lemma 4** *Consider  $\mathcal{G}^* \subseteq \mathcal{G}^{(k)}$  to be the set of groups intersecting with the support of  $\boldsymbol{\theta}^*$ , and let  $S$  be the union of groups in  $\mathcal{G}^*$ , such that  $s = |S|$ . Then,*

$$\mathbf{E}_{\mathbf{g}}[t(\mathbf{g})^2] \leq \left( \sqrt{2k \log \left( p - k - \left\lceil \frac{s}{k} \right\rceil + 2 \right)} + \sqrt{k} \right)^2. \quad (\text{A.60})$$

*Proof:* Note that

$$\mathbf{E}_{\mathbf{g}}[t(\mathbf{g})^2] = \mathbf{E}_{\mathbf{g}} \left[ \left( \max \left\{ \|\mathbf{g}_G\|_2 : G \in \mathcal{G}^{(k)}, G \subseteq S^c \right\} \right)^2 \right] \quad (\text{A.61})$$

$$\leq \mathbf{E}_{\mathbf{g}} \left[ \max \left\{ \|\mathbf{g}_G\|_2^2 : G \in \mathcal{G}^{(k)}, G \subseteq S^c \right\} \right] \quad (\text{A.62})$$



Each term  $\|\mathbf{g}_G\|_2^2$  is a  $\chi$ -squared variable with at most  $k$  degrees of freedom. Since the set  $S$  has size  $s$ , the set  $\mathcal{G}^*$  has to contain at least  $s_k = \lceil \frac{s}{k} \rceil$  groups of size  $k$ . Therefore,

$$s = |S| \geq k + (s_k - 1), \quad (\text{A.63})$$

and therefore the size of its complement is upper bounded by

$$|S^c| \leq p - k - s_k + 1. \quad (\text{A.64})$$

Therefore the following inequality provides an upper bound on the number of groups involved in computing the maximum in (A.62)

$$\left| \left\{ G \in \mathcal{G}^{(k)}, G \subseteq S^c \right\} \right| \leq \binom{p-k-s_k+1}{k} + \binom{p-k-s_k+1}{k-1} + \dots + \binom{p-k-s_k+1}{1} \quad (\text{A.65})$$

$$\leq (p - k - s_k + 2)^k \quad (\text{A.66})$$

where we have used the following inequality

$$\binom{n}{h} \leq \frac{n^h}{h!}, \quad \forall n \geq h \geq 0, \quad (\text{A.67})$$

which also provides

$$\sum_{h=1}^k \binom{n}{h} \leq (n+1)^k. \quad (\text{A.68})$$

Therefore, we can upper bound (A.62) using Lemma 3 as

$$\mathbf{E}_{\mathbf{g}}[t(\mathbf{g})^2] \leq \mathbf{E}_{\mathbf{g}} \left[ \max \left\{ \|\mathbf{g}_G\|_2^2 : G \in \mathcal{G}^{(k)}, G \subseteq S^c \right\} \right] \quad (\text{A.69})$$

$$\leq \left( \sqrt{2 \log \left( (p - k - \lceil \frac{s}{k} \rceil + 2)^k \right)} + \sqrt{k} \right)^2 \quad (\text{A.70})$$

and the statement follows. ■

Now we are ready to prove the upper bound on the Gaussian width. First, note that

$$\omega(\mathcal{T}_{\mathcal{A}}(\boldsymbol{\theta}^*) \cap \mathbb{S}^{p-1})^2 \leq \mathbf{E}_{\mathbf{g}}[\text{dist}(\mathbf{g}, \mathcal{N}_{\mathcal{A}}(\boldsymbol{\theta}^*))^2] \quad (\text{A.71})$$

$$\stackrel{(a)}{\leq} \mathbf{E}_{\mathbf{g}}[\|\mathbf{g} - \mathbf{z}(\mathbf{g})\|_2^2] \quad (\text{A.72})$$

$$= \mathbf{E}_{\mathbf{w}}[\|\mathbf{z}_S - \mathbf{g}_S\|_2^2] \quad (\text{A.73})$$

$$\stackrel{(b)}{=} \mathbf{E}[\|\mathbf{z}_S\|_2^2] + \mathbf{E}[\|\mathbf{g}_S\|_2^2] \quad (\text{A.74})$$

$$\stackrel{(c)}{=} \mathbf{E}[t(\mathbf{g})^2] \cdot \|\mathbf{v}_S\|_2^2 + |S| \quad (\text{A.75})$$

$$\stackrel{(d)}{\leq} \left( \sqrt{2k \log \left( (p - k - \lceil \frac{s}{k} \rceil + 2) \right)} + \sqrt{k} \right)^2 \cdot \lceil \frac{s}{k} \rceil + s, \quad (\text{A.76})$$

where (a) follows from the definition of distance to a set, (b) follows from the independence of  $\mathbf{g}_S$  and  $\mathbf{g}_{S^c}$ , (c) follows from the fact that the expected length of an  $|S|$  length random i.i.d. Gaussian vector is  $\sqrt{|S|}$ , and (d) follows since  $|S| = \frac{ks}{k}$ , and that  $\|\mathbf{v}_S\|_2 \leq \sqrt{\lceil \frac{s}{k} \rceil} \|\mathbf{v}_S\|_k^{sp^*} = \sqrt{\lceil \frac{s}{k} \rceil}$ . Thus inequality (28) follows. ■

Next, we prove inequality (27). Let us denote  $\mathbf{t} = \mathbf{X}^T \mathbf{w}$ , and note that  $\mathbf{t} \sim \mathcal{N}(0, I_p)$

$$\|\mathbf{X}^T(\mathbf{y} - \mathbf{X}\boldsymbol{\theta}^*)\|_k^{sp^*} = \|\mathbf{X}^T \mathbf{w}\|_k^{sp^*} = \|\mathbf{t}\|_k^{sp^*} = \max\{\|\mathbf{t}_G\|_2 : G \in \mathcal{G}^{(k)}\}. \quad (\text{A.77})$$

Therefore, we can use Lemma 3 in order to bound the expectation  $\mathbf{E}[\|\mathbf{t}\|_k^{sp*}]$  as

$$\mathbf{E}[\|\mathbf{t}\|_k^{sp*}] = \mathbf{E}[\max\{\|\mathbf{t}_G\|_2 : G \in \mathcal{G}^{(k)}\}] \quad (\text{A.78})$$

$$= \mathbf{E}[\max\{\|\mathbf{t}_G\|_2 : G \in \mathcal{G}^{(k)}, |G| = k\}] \quad (\text{A.79})$$

$$\leq \left( \sqrt{2 \log \binom{p}{k}} + \sqrt{k} \right)^2 \quad (\text{A.80})$$

$$\leq \left( \sqrt{2k \log \left( \frac{ep}{k} \right)} + \sqrt{k} \right)^2 \quad (\text{A.81})$$

where we have used the inequality

$$\binom{p}{k} \leq \left( \frac{ep}{k} \right)^k \quad (\text{A.82})$$

Therefore, inequality (27) follows, and by our choice of  $\lambda_p$ , with high probability,  $\boldsymbol{\theta}^*$  lies in the feasible set. ■

## References

- [1] Venkat Chandrasekaran, Benjamin Recht, Pablo A Parrilo, and Alan S Willsky. The convex geometry of linear inverse problems. *Foundations of Computational Mathematics*, 12(6):805–849, 2012.
- [2] Michel Ledoux and Michel Talagrand. *Probability in Banach Spaces: isoperimetry and processes*, volume 23. Springer, 1991.
- [3] Nikhil S Rao, Ben Recht, and Robert D Nowak. Universal measurement bounds for structured sparse signal recovery. In *International Conference on Artificial Intelligence and Statistics*, pages 942–950, 2012.
